# Supplementary material
Source: publisher figshare collection journal article supplement (https://tandf.figshare.com/articles/dataset/_/12116148)
Supplement: Supplementary file 1 [file 1]

| Gene name       | RAP ID       | AGI code  |
|-----------------|--------------|-----------|
| <i>OsWRKY45</i> | Os05g0322900 | -         |
| <i>OsUBQ1</i>   | Os03g0234200 | -         |
| <i>AtPR1</i>    | -            | At2g14610 |
| <i>AtPR2</i>    | -            | At3g57260 |
| <i>AtPR5</i>    | -            | At1g75040 |
| <i>AtUBQ2</i>   | -            | At2g36170 |

Table S1. Gene specific ID used for real-time PCR.
