# Supplementary material
Source: publisher figshare collection journal article supplement (https://tandf.figshare.com/articles/dataset/_/12116148)
Supplement: Supplementary file 2 [file 1]

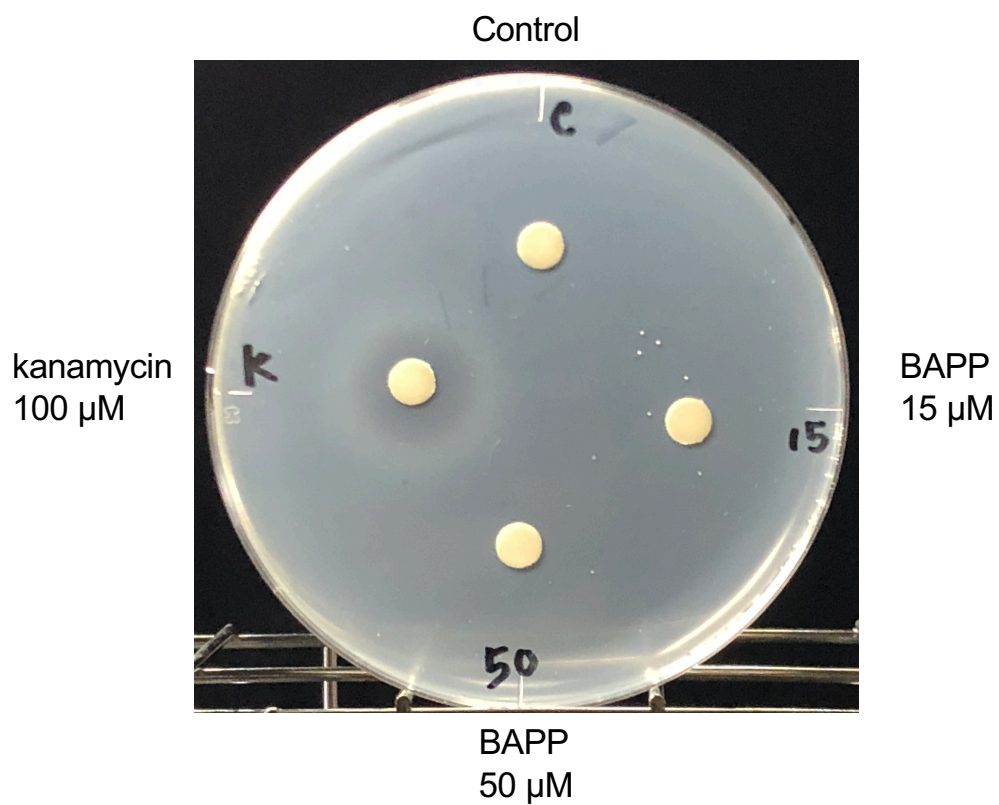

Figure S1. Effect of BAPP on *Pst* DC300 growth. *Pst* DC3000 was grown for 24 h in NB liquid medium. Sterilized filter paper (diameter 6 mm) containing 20  $\mu$ l of sample solution was placed onto a NB medium plates supplemented with bacterial suspension (final concentration  $1 \times 10^4$  cfu/ml). The halo appeared on the plate was measured after incubation for 2 days at 30°C.
