# Supplementary material
Source: publisher figshare collection journal article supplement (https://tandf.figshare.com/articles/dataset/_/12116148)
Supplement: Supplementary file 3 [file 1]

Archive with 2 entries (2 files):
- tbbb_a_1750341_sm1949.pdf
- tbbb_a_1750341_sm1948.pdf
